# Supplementary material for: Weekly variation in markers of cardiometabolic health – the possible effect of weekend behavior – a cross-sectional study
Source: Springer Nature journal article supplement (doi:10.1186/s12872-020-01692-x), 2020-09-07
Supplement: MOESM1 [file 18354992]

## Supplementary file 1. Self-assessment of pubertal status

### Self-assessment of pubertal status (Girls)

ID: \_\_\_\_\_

Date: \_\_\_\_\_

Age: \_\_\_\_\_

School: \_\_\_\_\_

Class: \_\_\_\_\_

#### Pubic hair

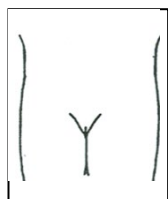

There is no pubic hair ☐

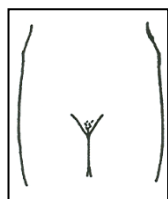

There is almost no, or very little, hair ☐

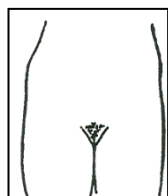

The pubic hair has become darker and more dense ☐

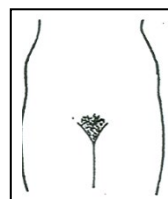

The pubic hair is almost like that of an adult woman ☐

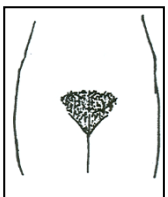

The pubic hair is like that of a young adult woman ☐

#### Breast development

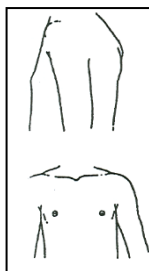

The nipple has not started growing ☐

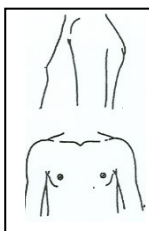

The nipple has just started growing ☐

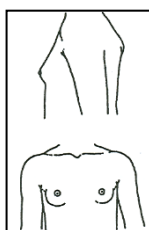

The breast itself has started growing and ☐

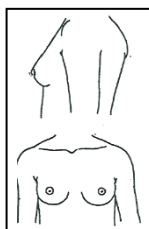

The breast is almost like that of a young adult woman ☐

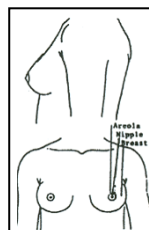

The breast has developed like that of a young adult woman ☐

Menstruation debut: yes ☐

No ☐

## Self-assessment of pubertal status (Boys)

ID: \_\_\_\_\_

Date: \_\_\_\_\_

Age: \_\_\_\_\_

School: \_\_\_\_\_

Class: \_\_\_\_\_

### Pubic hair

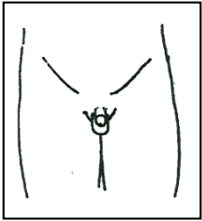

There is no pubic hair

☐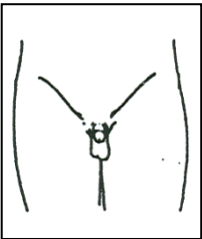

There is almost no, or very little, pubic hair

☐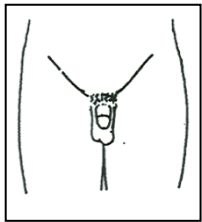

The pubic hair has become darker and more dense

☐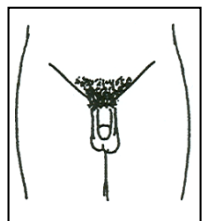

The pubic hair is almost like that of a young adult man

☐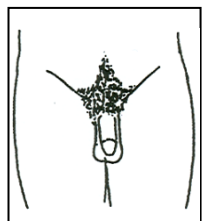

The pubic hair is like that of a young adult man

☐

(Note: In the original version, the drawings were accompanied by an explanatory text in Danish. Children were asked, separately and in privacy, to point out the drawing that they considered resembled their own pubertal stage the most).
