# Supplementary material for: Weekly variation in markers of cardiometabolic health – the possible effect of weekend behavior – a cross-sectional study
Source: Springer Nature journal article supplement (doi:10.1186/s12872-020-01692-x), 2020-09-07
Supplement: MOESM2 [file 18354992]

## **Supplementary file 2. Parents' education and type of work**

### **1) What is your highest education (please do not indicate any uncompleted education)?**

Mother/female guardian

- 1) ☐ Lower secondary school (9 years)
- 2) ☐ Lower secondary school (10 years)
- 3) ☐ Upper secondary school (e.g., gymnasium, Higher Commercial Education Programme, Higher Technical Education Programme)
- 4) ☐ Vocational education (e.g., business college (basic commercial course), internship training, Social and Health Care Training Programme, carpenter, bricklayer)
- 5) ☐ Short tertiary education (e.g., AP Graduate in Construction Technology, Commerce Management, or Computer Science, hygienist)
- 6) ☐ Medium tertiary education (e.g., bachelor or equivalent, schoolteacher, physiotherapist, nurse)
- 7) ☐ Long tertiary education (e.g., master or equivalent, graduate engineer, medical doctor)

Father/male guardian

- 1) ☐ Lower secondary school (9 years)
- 2) ☐ Lower secondary school (10 years)
- 3) ☐ Upper secondary school (e.g., gymnasium, Higher Commercial Education Programme, Higher Technical Education Programme)
- 4) ☐ Vocational education (e.g., business college (basic commercial course), internship training, Social and Health Care Training Programme), carpenter, bricklayer)
- 5) ☐ Short tertiary education (e.g., AP Graduate in Construction Technology, Commerce Management, or Computer Science, hygienist)
- 6) ☐ Medium tertiary education (e.g., bachelor or equivalent, schoolteacher, physiotherapist, nurse)
- 7) ☐ Long tertiary education (e.g., master or equivalent, graduate engineer, medical doctor)

**2) What is your current employment / job position?**

a) Mother/female guardian \_\_\_\_\_

b) Father/male guardian \_\_\_\_\_

**3) How many hours a week do you work on average?**

a) Mother/female guardian \_\_\_\_\_

b) Father/male guardian \_\_\_\_\_

**4) Please fill in the form below if you do not have a job**

|                              | Unemployed<br>(unemployment<br>insurance) | Social<br>assistance<br>recipients (welfare) | Voluntary<br>early retiree   | Early<br>retirement          | Retiree                      | Other                                 |
|------------------------------|-------------------------------------------|----------------------------------------------|------------------------------|------------------------------|------------------------------|---------------------------------------|
| a) Mother/female<br>guardian | (1) <input type="checkbox"/>              | (2) <input type="checkbox"/>                 | (3) <input type="checkbox"/> | (4) <input type="checkbox"/> | (5) <input type="checkbox"/> | (6) <input type="checkbox"/><br>_____ |
| b) Father/male<br>guardian   | (1) <input type="checkbox"/>              | (2) <input type="checkbox"/>                 | (3) <input type="checkbox"/> | (4) <input type="checkbox"/> | (5) <input type="checkbox"/> | (6) <input type="checkbox"/><br>_____ |
